# Supplementary material
Source: PubMed Central journal article supplement (PMC5728702)

**SUPPLEMENTAL MATERIAL**

**Table S1. Sensitivity Analysis among Chinese MESA Participants Not Taking Antihypertensive Medications for Significant SNPs.**

| rsID                                  | SNP term |       |          | Interaction term |      |                 | covariance | Joint <i>P</i>  |
|---------------------------------------|----------|-------|----------|------------------|------|-----------------|------------|-----------------|
|                                       | Beta     | SE    | <i>P</i> | Beta             | SE   | <i>P</i>        |            |                 |
| <b><i>Systolic Blood Pressure</i></b> |          |       |          |                  |      |                 |            |                 |
| rs16882447                            | 72.64    | 24.37 | 6.90E-03 | -1.54            | 0.50 | <b>5.63E-03</b> | -11.92     | <b>1.99E-02</b> |
| <b><i>Pulse Pressure</i></b>          |          |       |          |                  |      |                 |            |                 |
| rs958929                              | 17.61    | 7.06  | 2.06E-02 | -0.37            | 0.15 | <b>2.35E-02</b> | -1.06      | 6.39E-02        |

**Table S2. Significant variants associated with urinary potassium levels in the *RANBP3L* gene in GenSalt.**

| SNP        | EA | EAF   | RSq   | CHR | Position<br>(build 36) | functions | Gene           | Beta | SE   | <i>P</i> |
|------------|----|-------|-------|-----|------------------------|-----------|----------------|------|------|----------|
| rs884693   | T  | 0.857 | 0.683 | 5   | 36337131               | Intronic  | <i>RANBP3L</i> | 1.77 | 0.51 | 6.00E-04 |
| rs10063851 | G  | 0.868 | 0.656 | 5   | 36319756               | Intronic  | <i>RANBP3L</i> | 1.74 | 0.52 | 9.00E-04 |
| rs10071638 | T  | 0.868 | 0.656 | 5   | 36319704               | Intronic  | <i>RANBP3L</i> | 1.74 | 0.52 | 9.00E-04 |

EA=effect allele; EAF=effect allele frequency; SE=standard error

**Figure S1. QQ Plots of SNP-Potassium Interaction Analysis Results for Systolic Blood Pressure (a), Diastolic Blood Pressure (b), Mean Arterial Pressure (c), and Pulse Pressure (d) Using 1 degree of freedom test.**

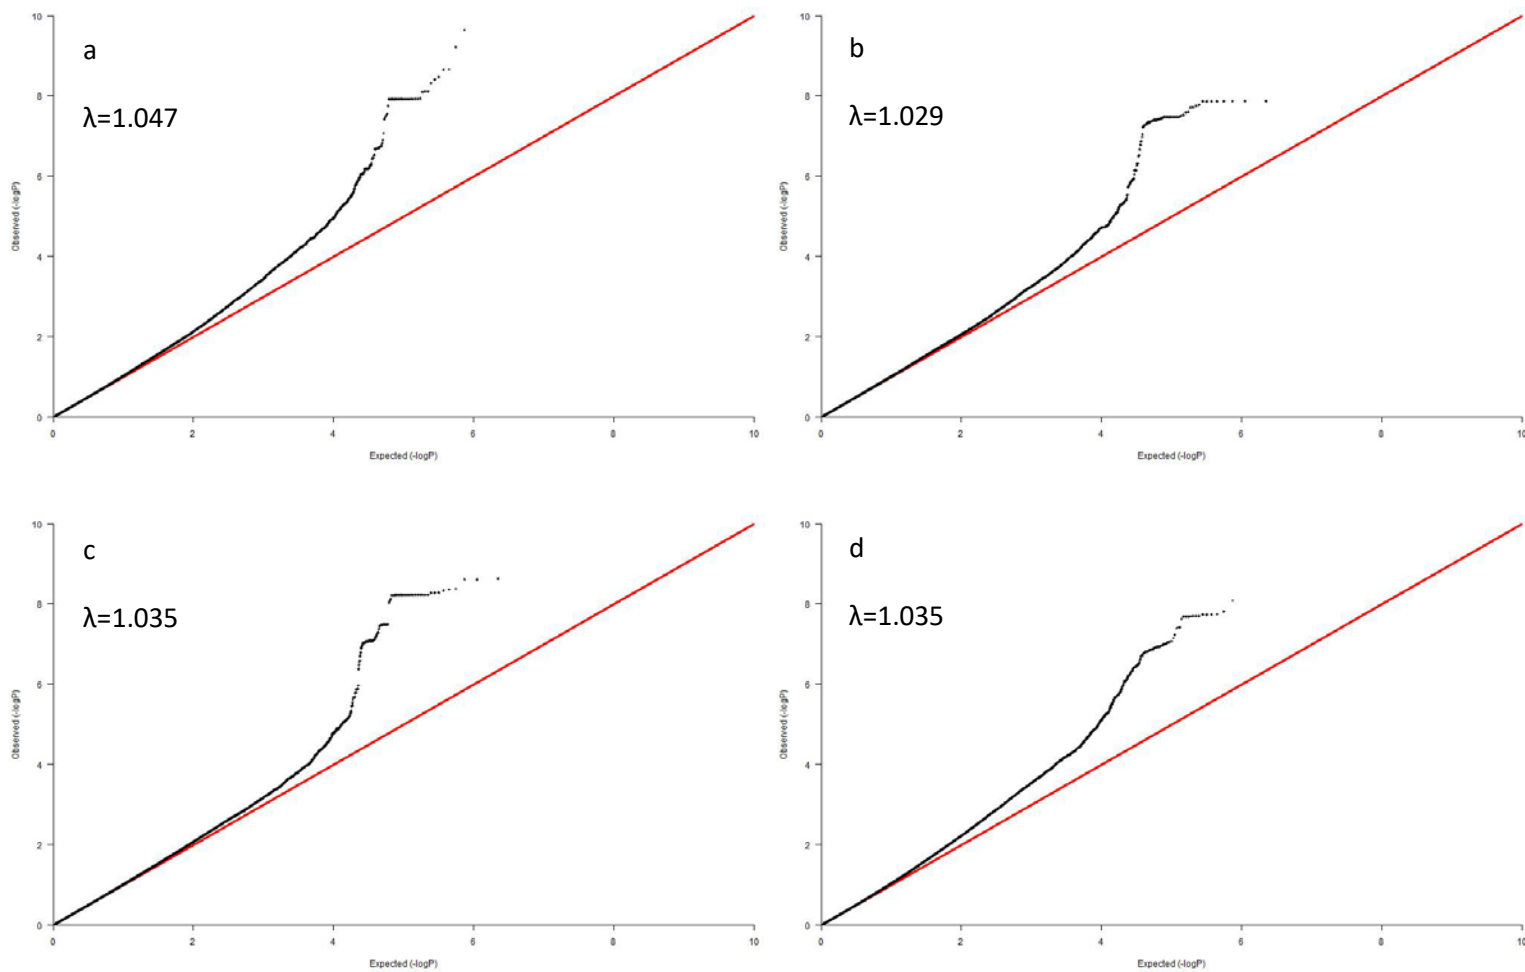

**Figure S2. QQ Plots of SNP-Potassium Interaction Analysis Results for Systolic Blood Pressure (a), Diastolic Blood Pressure (b), Mean Arterial Pressure (c), and Pulse Pressure (d) Using 2 degree of freedom test.**

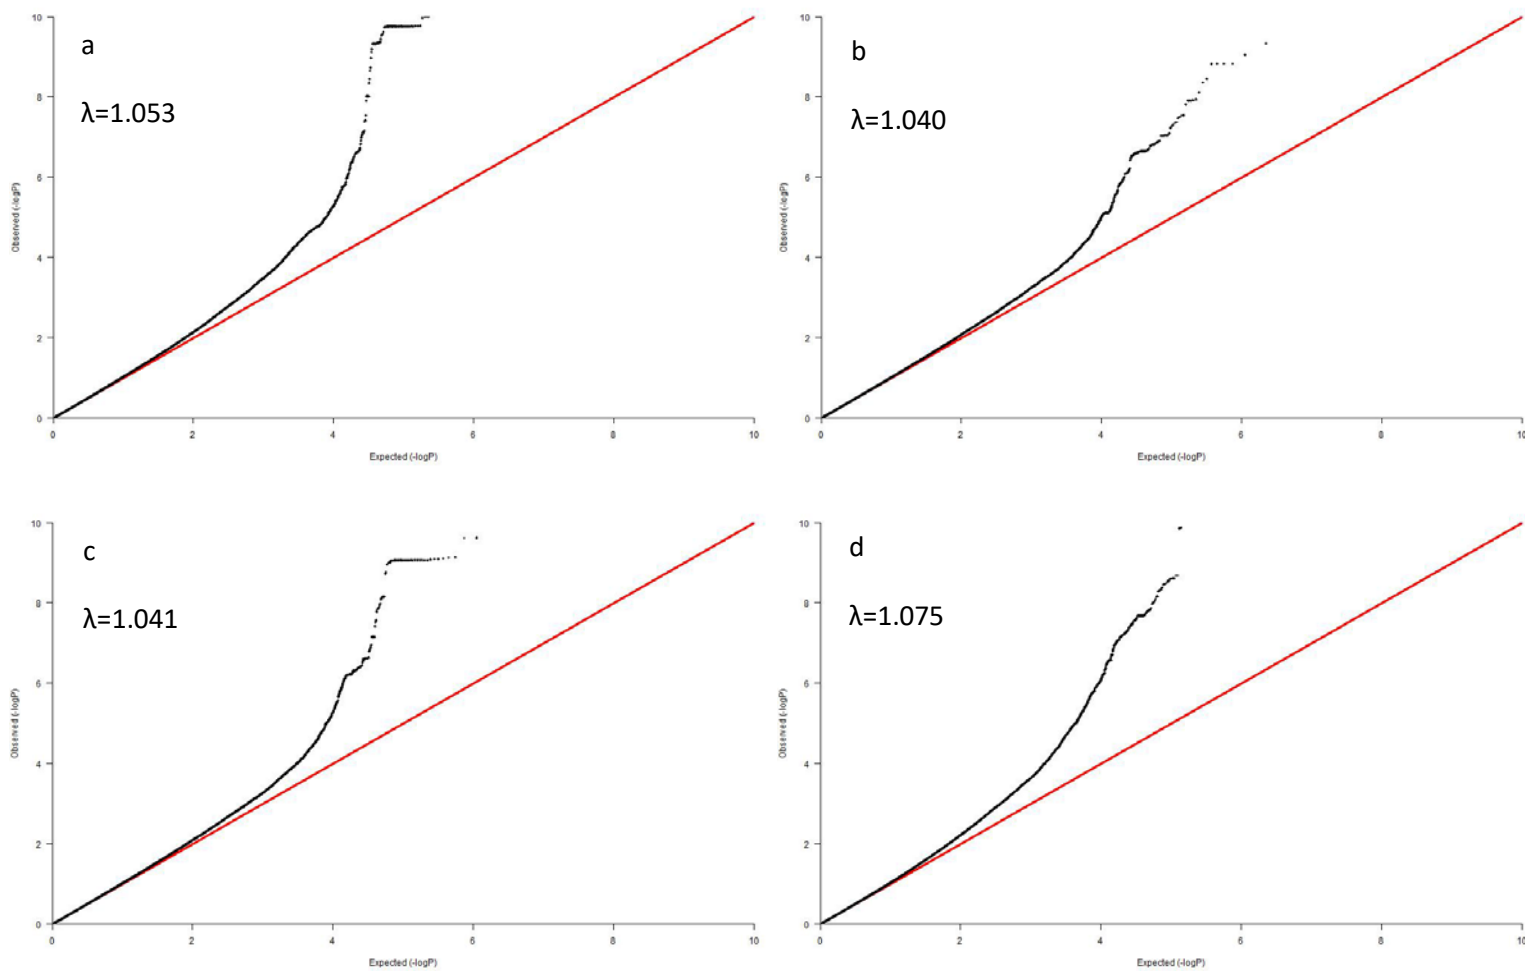

**Figure S3. QQ Plots of Gene-based Analysis Results for Systolic Blood Pressure (a), Diastolic Blood Pressure (b), Mean Arterial Pressure (c), and Pulse Pressure (d) Using 1 degree of freedom test.**

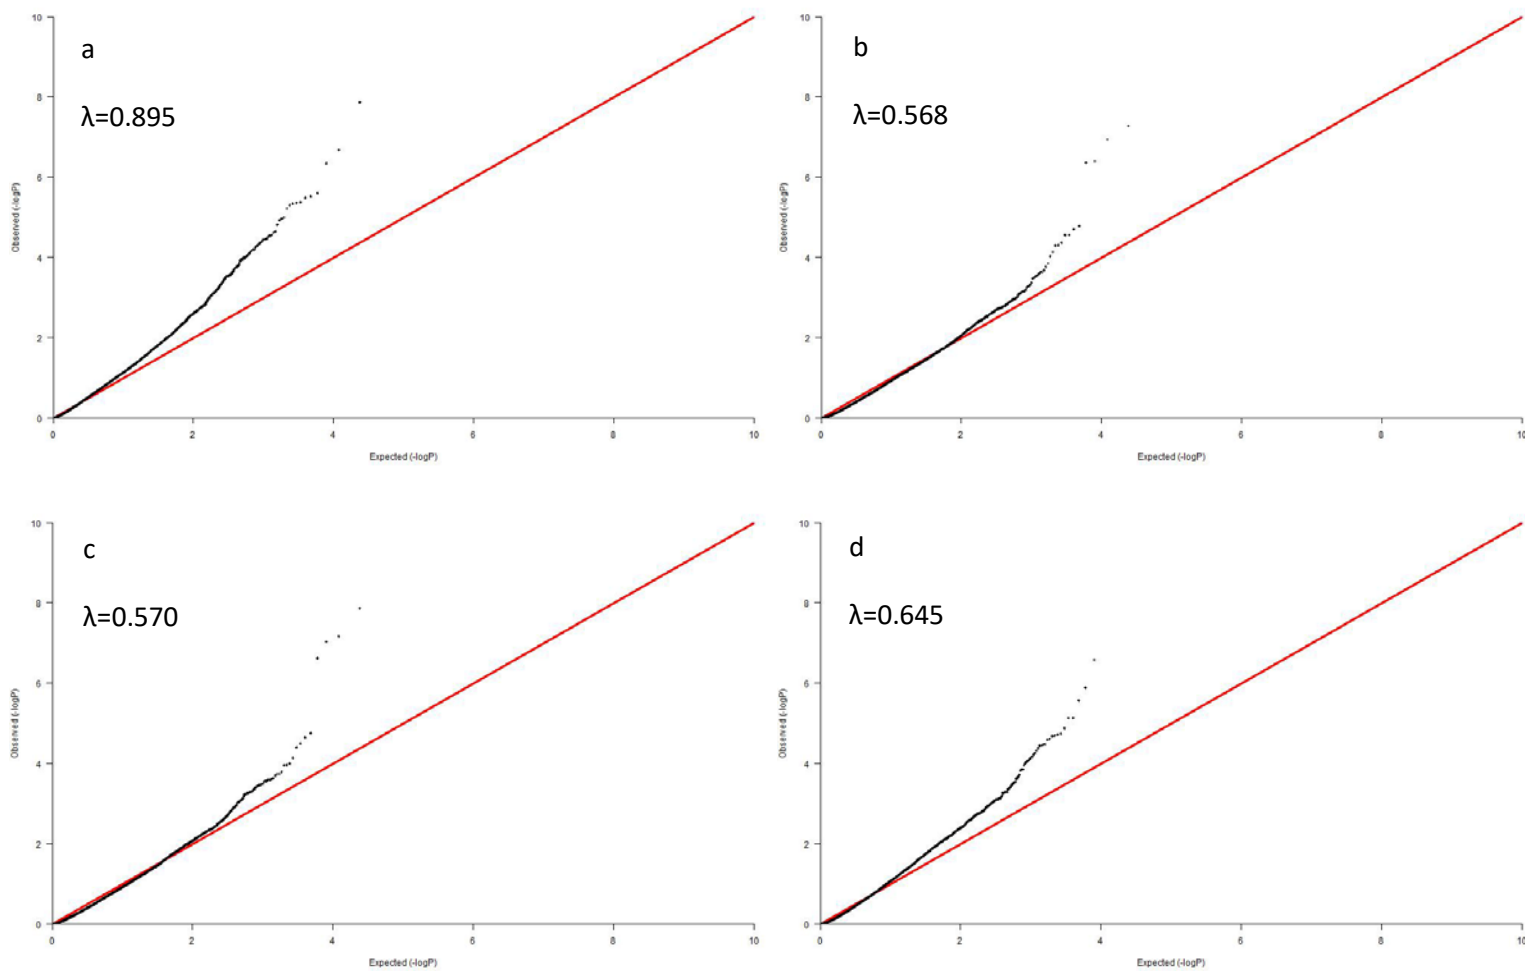

**Figure S4. QQ Plots of Gene-based Analysis Results for Systolic Blood Pressure (a), Diastolic Blood Pressure (b), Mean Arterial Pressure (c), and Pulse Pressure (d) Using 2 degree of freedom test.**

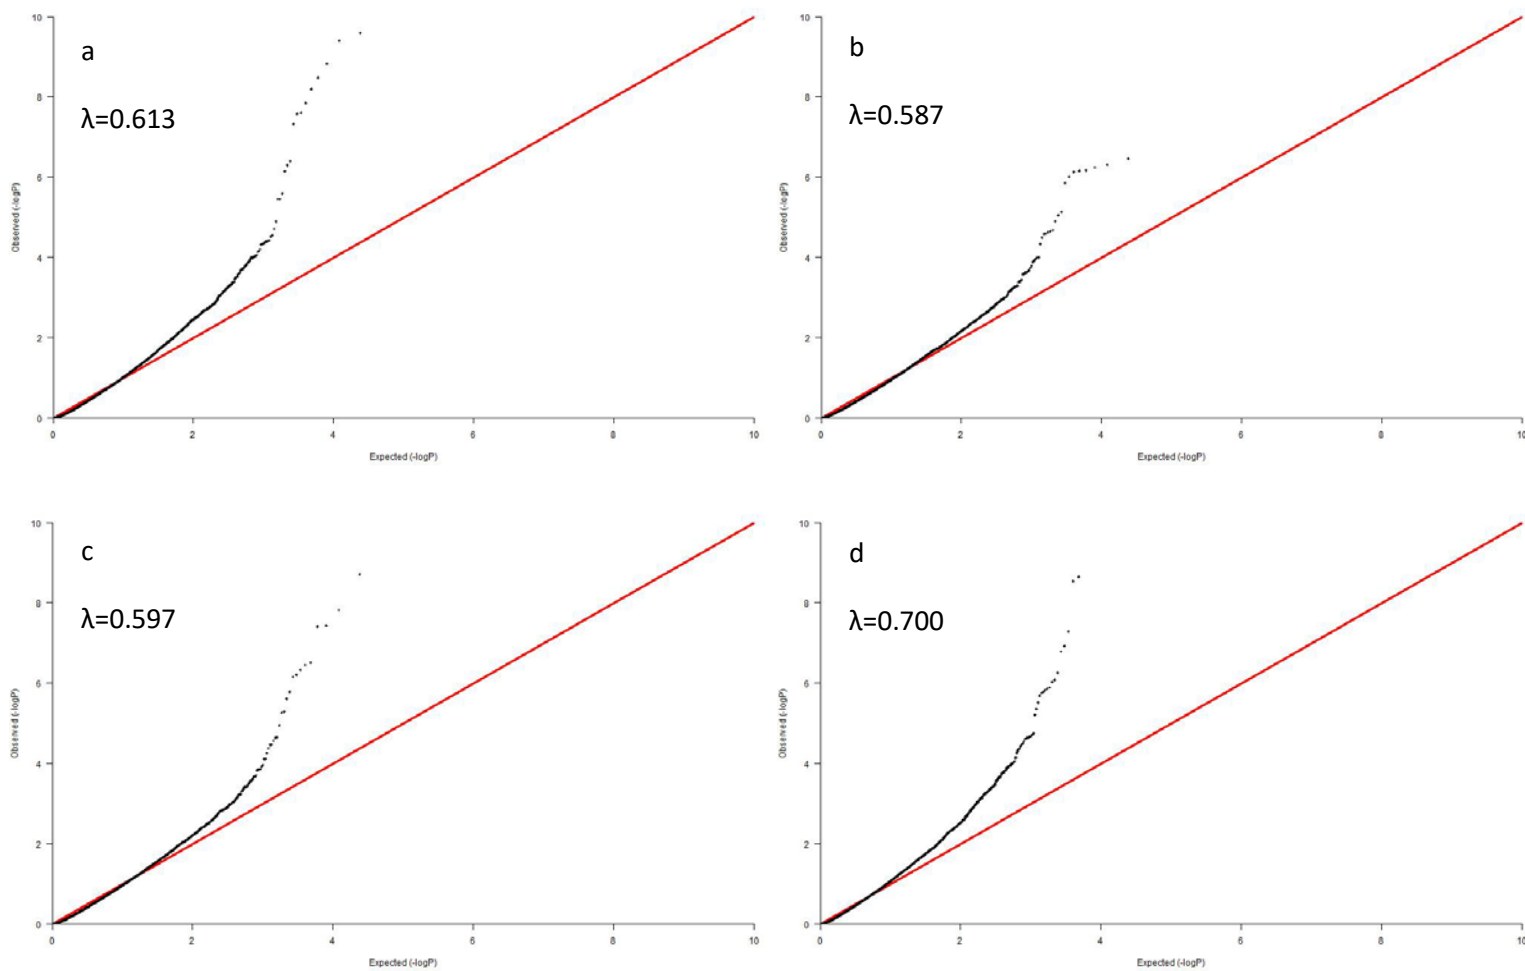

**Figure S5. Manhattan Plots of SNP-Potassium Interaction Analysis Results for Systolic Blood Pressure Using 1 degree of freedom test (above) and 2 degree of freedom joint test (below).**

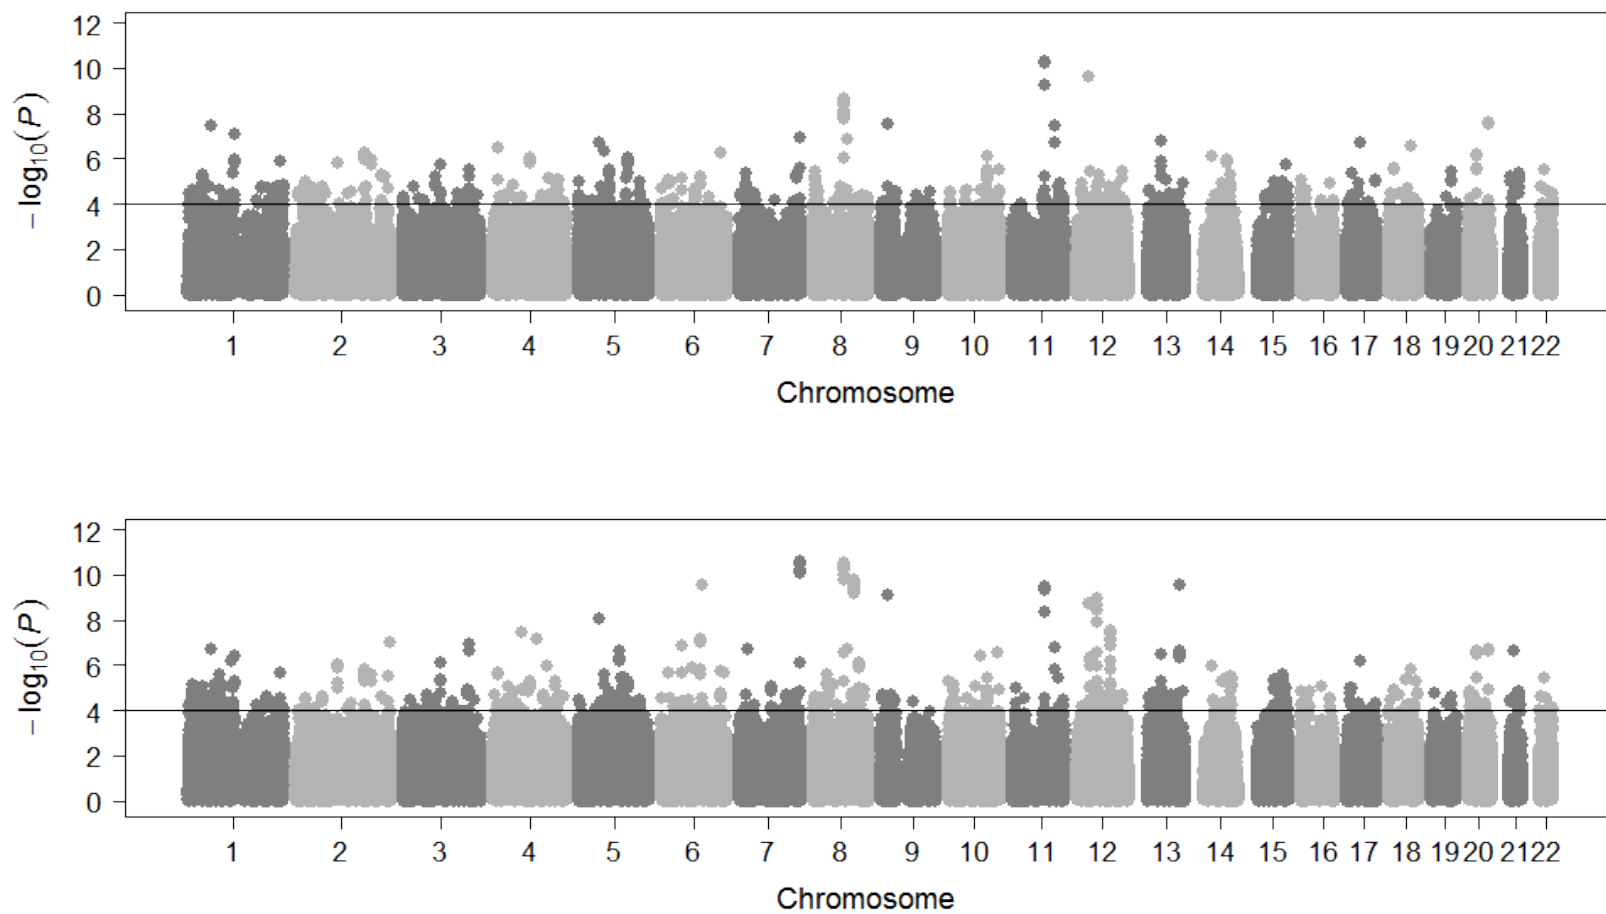

**Figure S6. Manhattan Plots of SNP-Potassium Interaction Analysis Results for Diastolic Blood Pressure Using 1 degree of freedom test (above) and 2 degree of freedom joint test (below).**

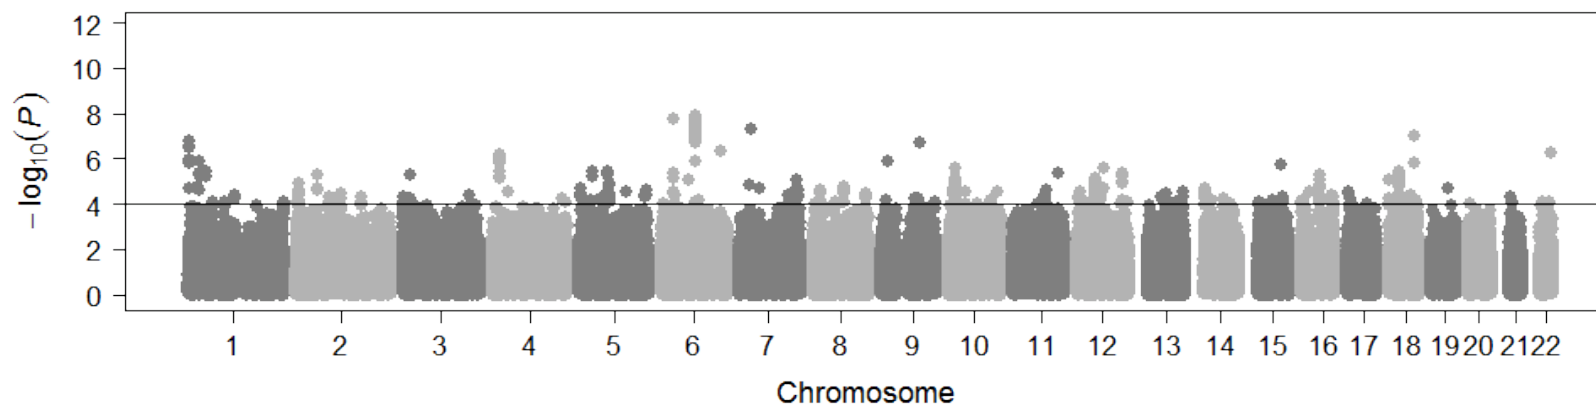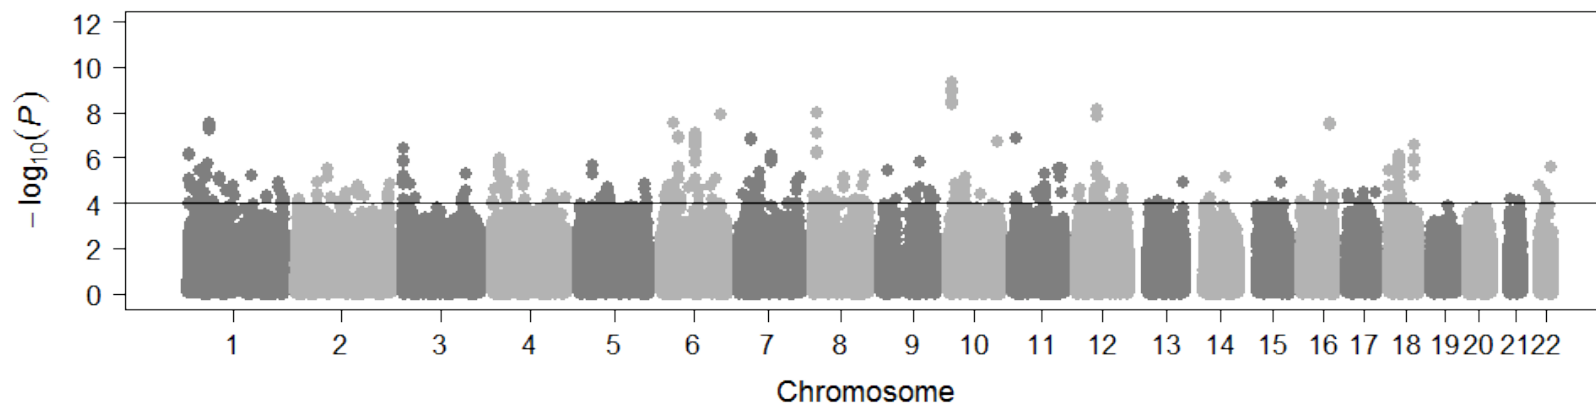

**Figure S7. Manhattan Plots of SNP-Potassium Interaction Analysis Results for Mean Arterial Pressure Using 1 degree of freedom test (above) and 2 degree of freedom joint test (below).**

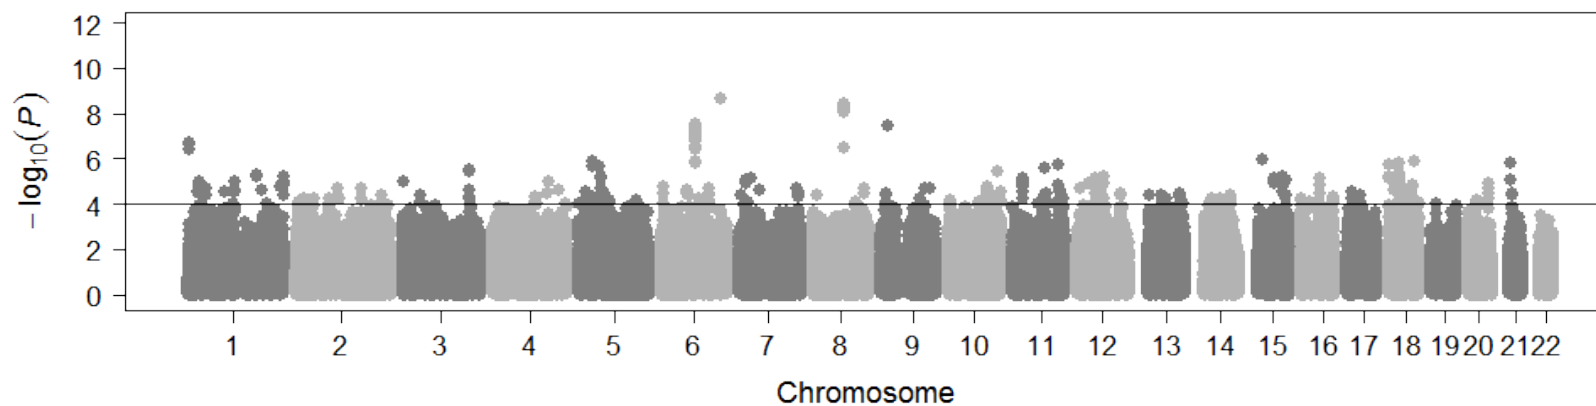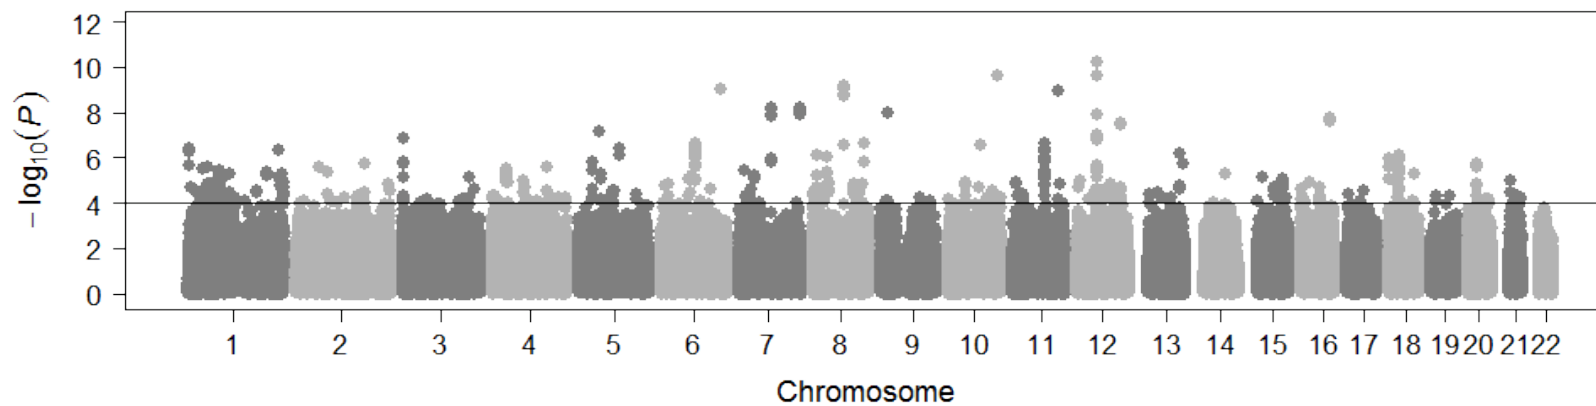



**Figure S8. Manhattan Plots of SNP-Potassium Interaction Analysis Results for Pulse Pressure Using 1 degree of freedom test (above) and 2 degree of freedom joint test (below).**

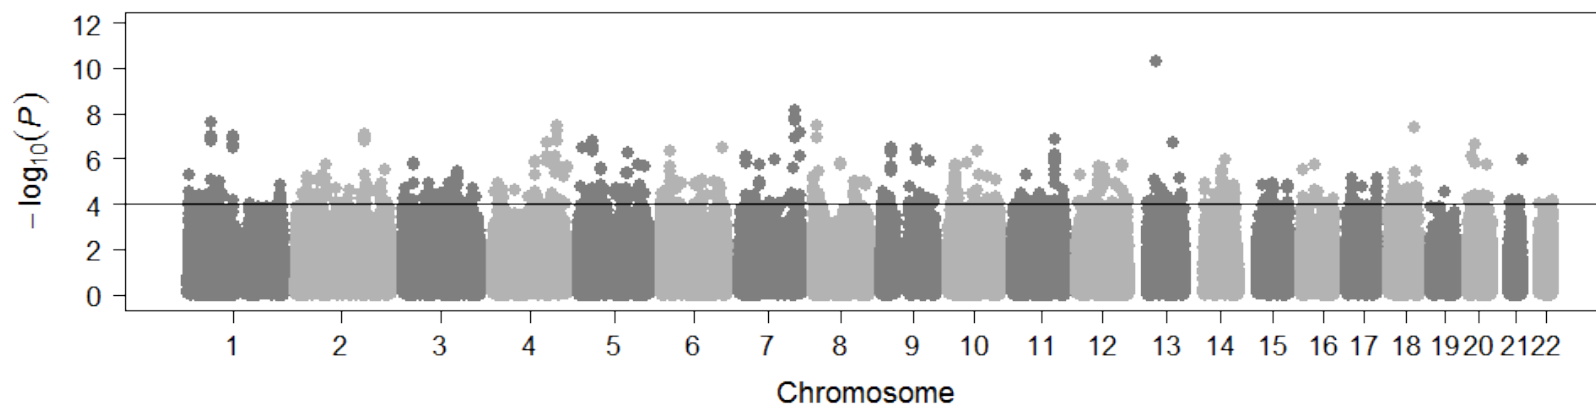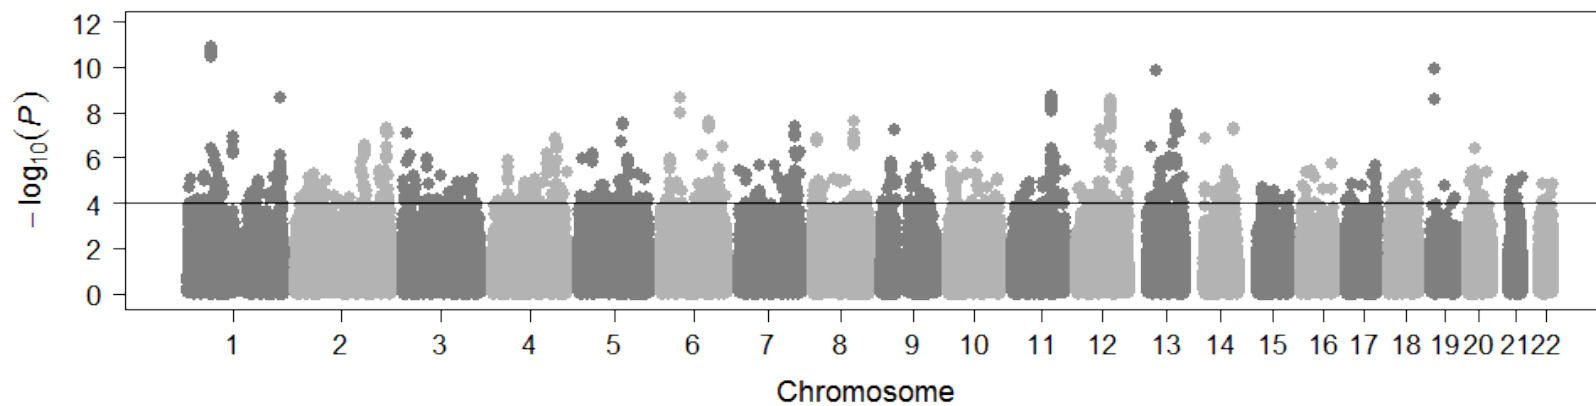

**Figure S9. Correlations between imputed dosage for rs16882447 and systolic blood pressure stratified by median level of urine potassium in GenSalt.**

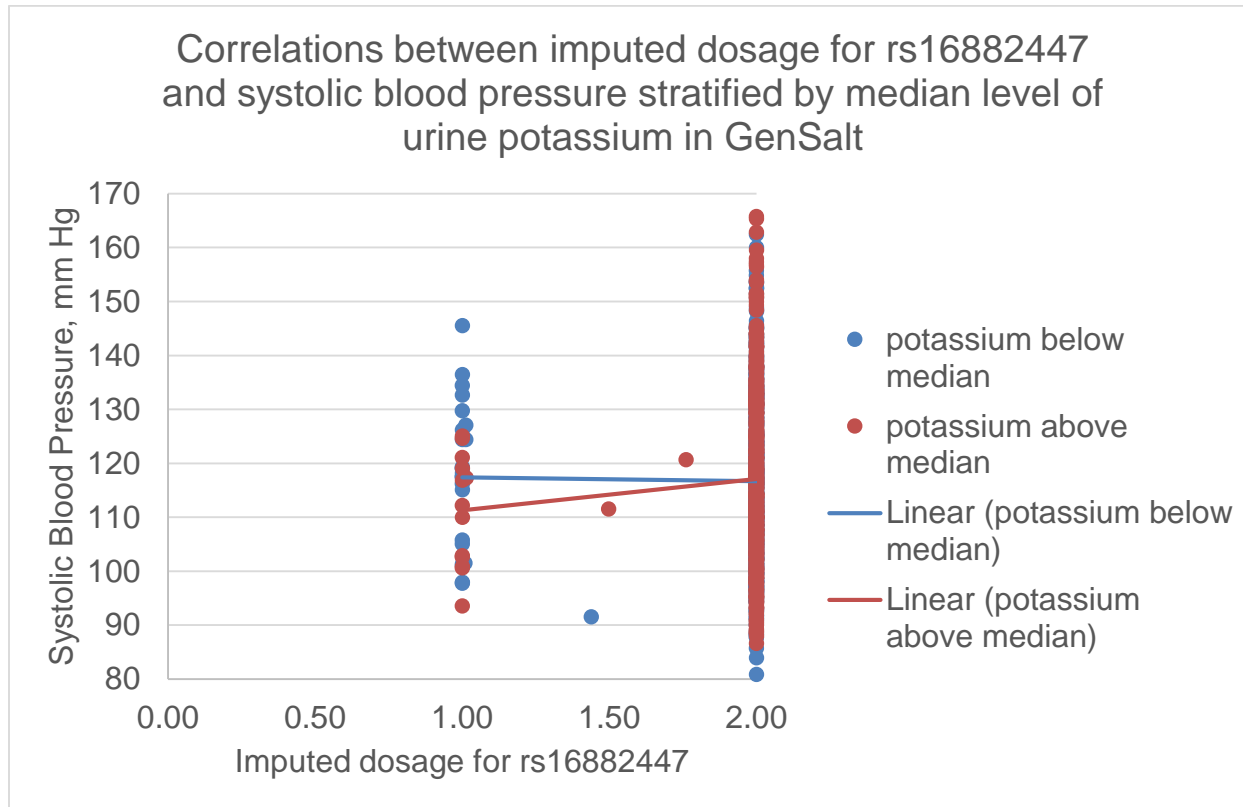

**Figure S10. Correlations between imputed dosage for rs16882447 and systolic blood pressure stratified by median level of urine potassium in MESA.**

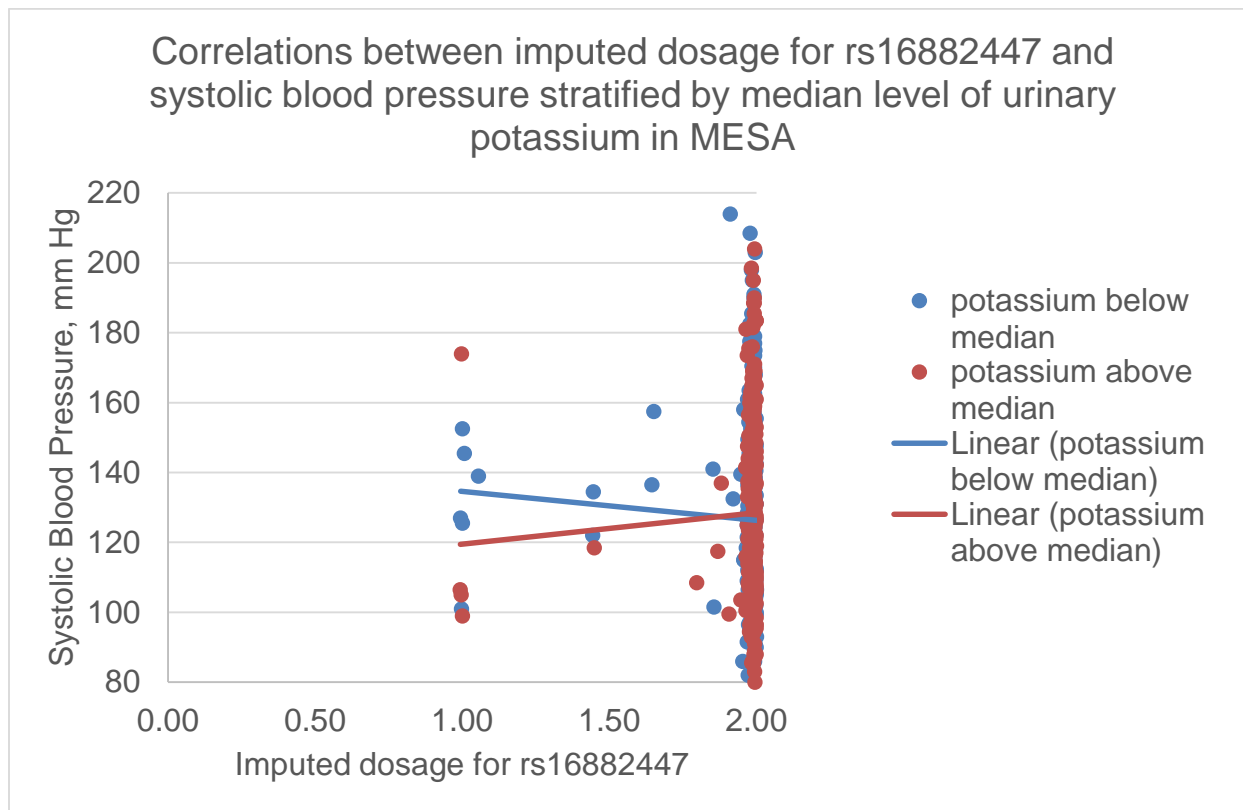

**Figure S11. Correlations between imputed dosage for rs958929 and pulse pressure stratified by median level of urine potassium in GenSalt.**

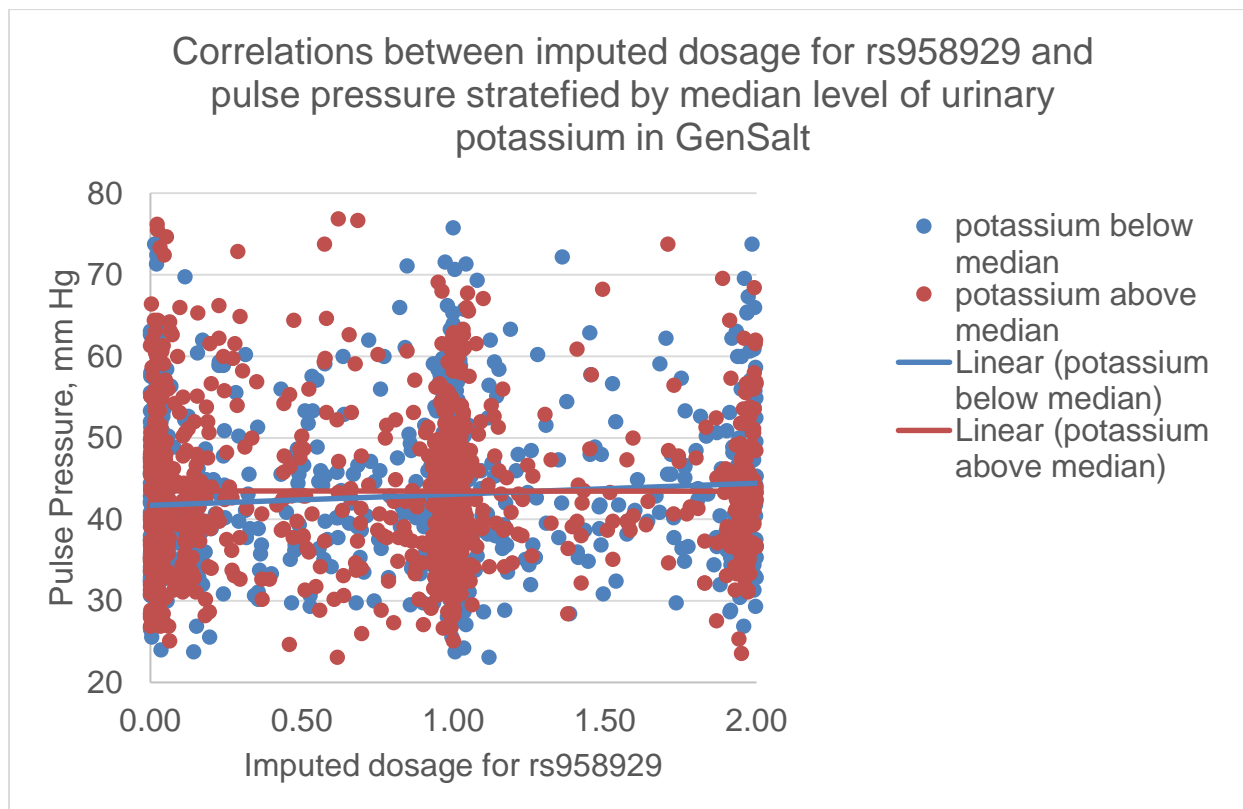

**Figure S12. Correlations between imputed dosage for rs958929 and pulse pressure stratified by median level of urine potassium in MESA.**

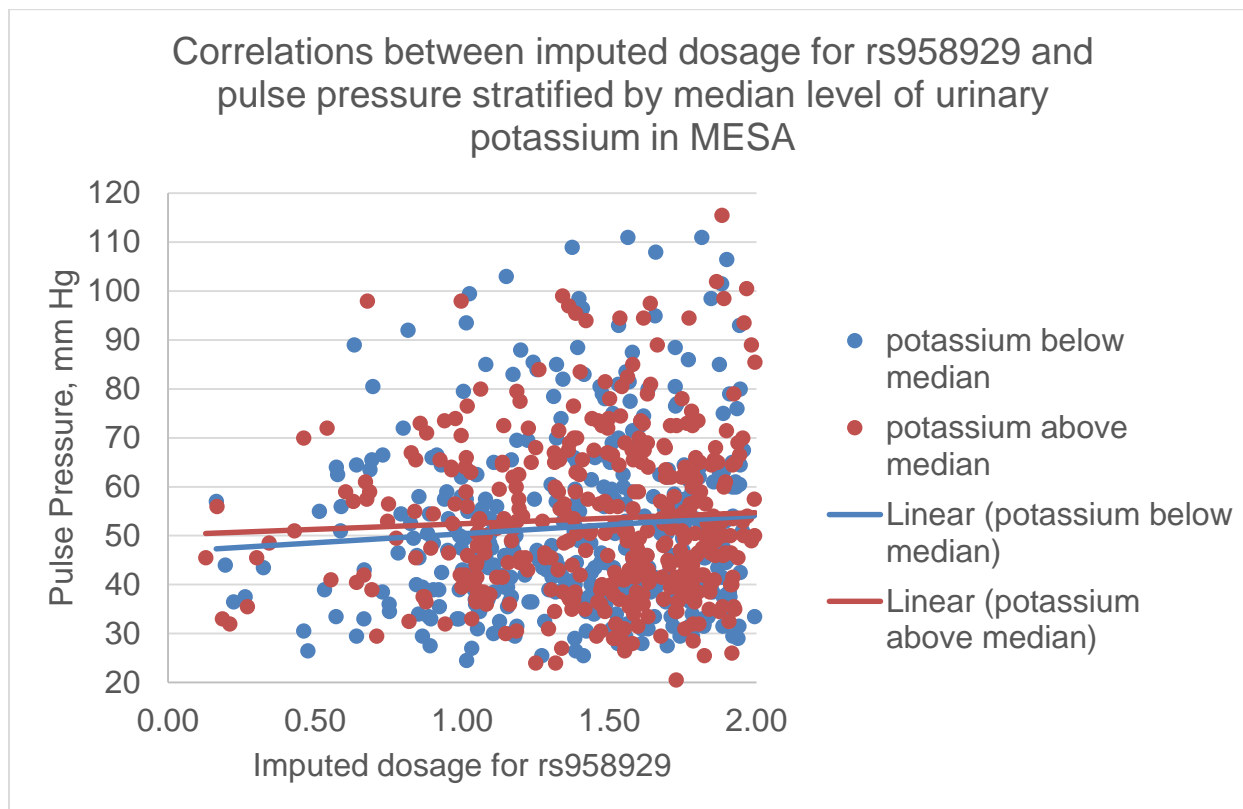

**Figure S13. Manhattan Plots of Gene-based Analysis Results from 1 degree of freedom test (above) and 2 degree of freedom joint test (below) for Systolic Blood Pressure.**

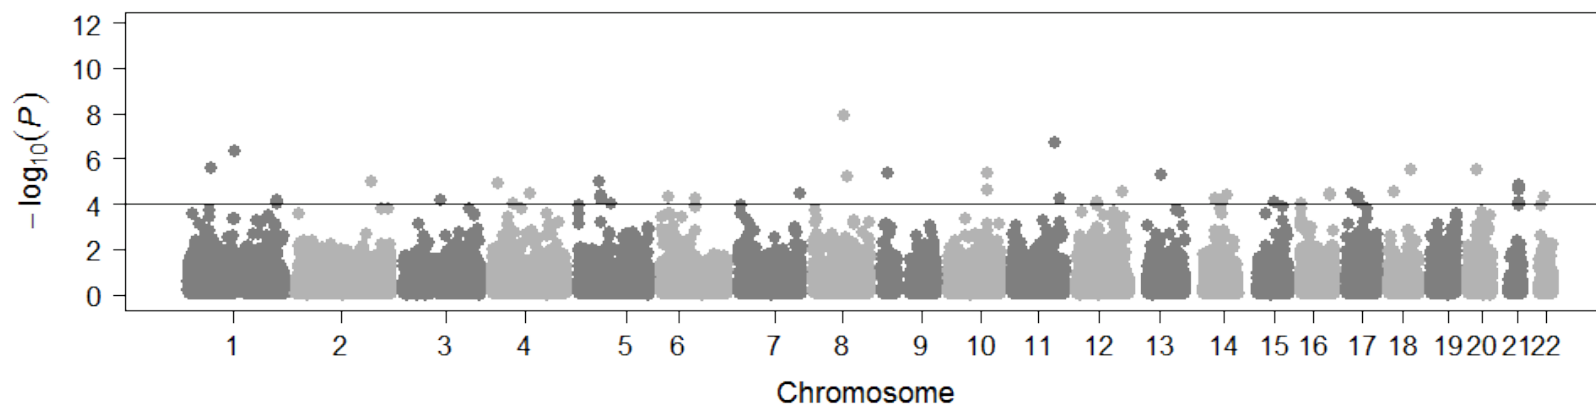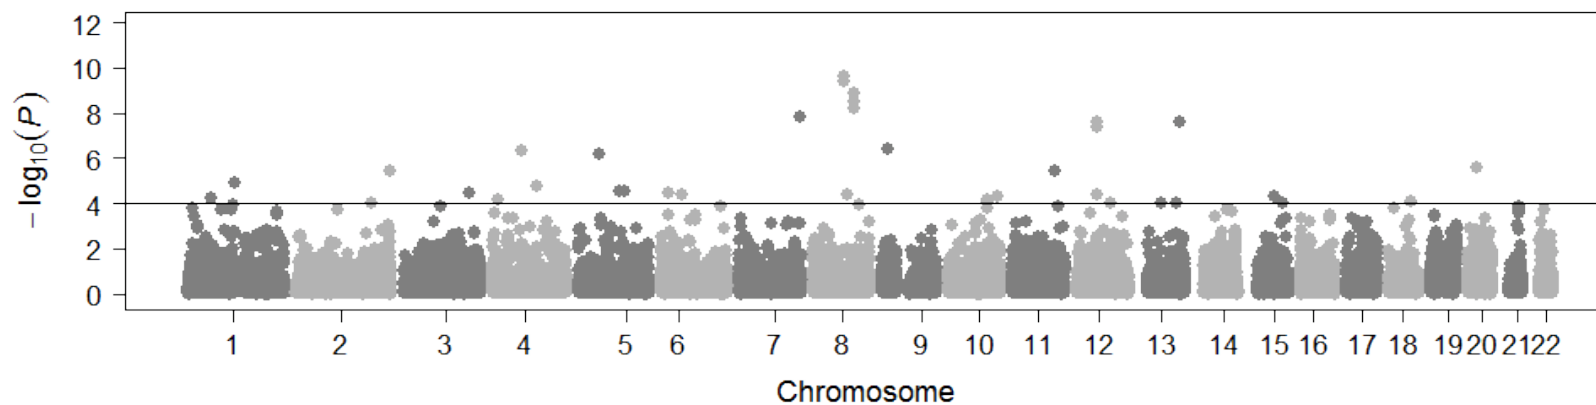

**Figure S14. Manhattan Plots of Gene-based Analysis Results from 1 degree of freedom test (above) and 2 degree of freedom joint test (below) for Diastolic Blood Pressure.**

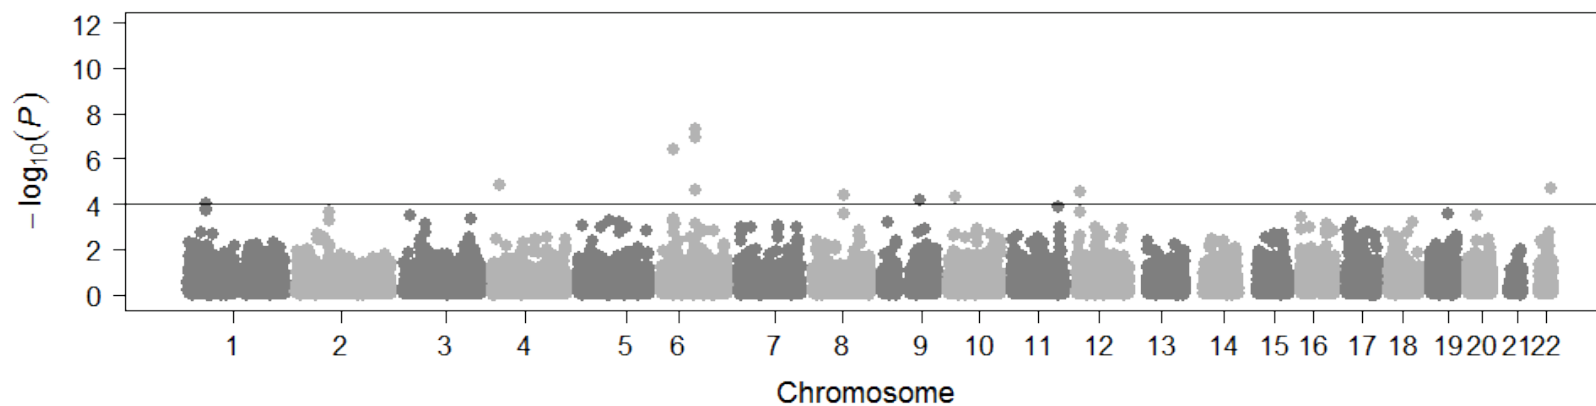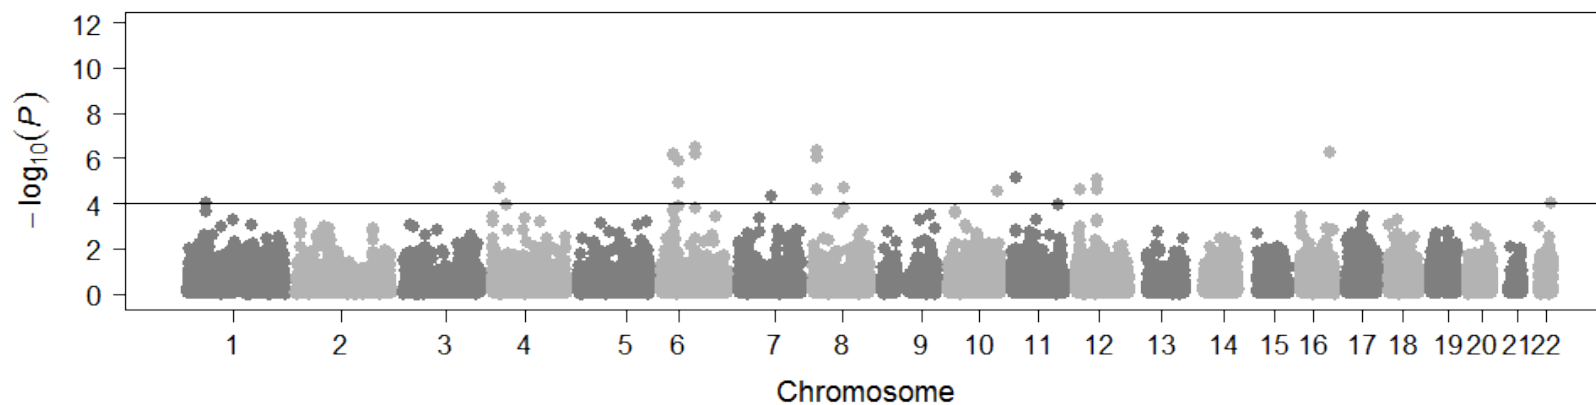

**Figure S15. Manhattan Plots of Gene-based Analysis Results from 1 degree of freedom test (above) and 2 degree of freedom joint test (below) for Mean Arterial Pressure.**

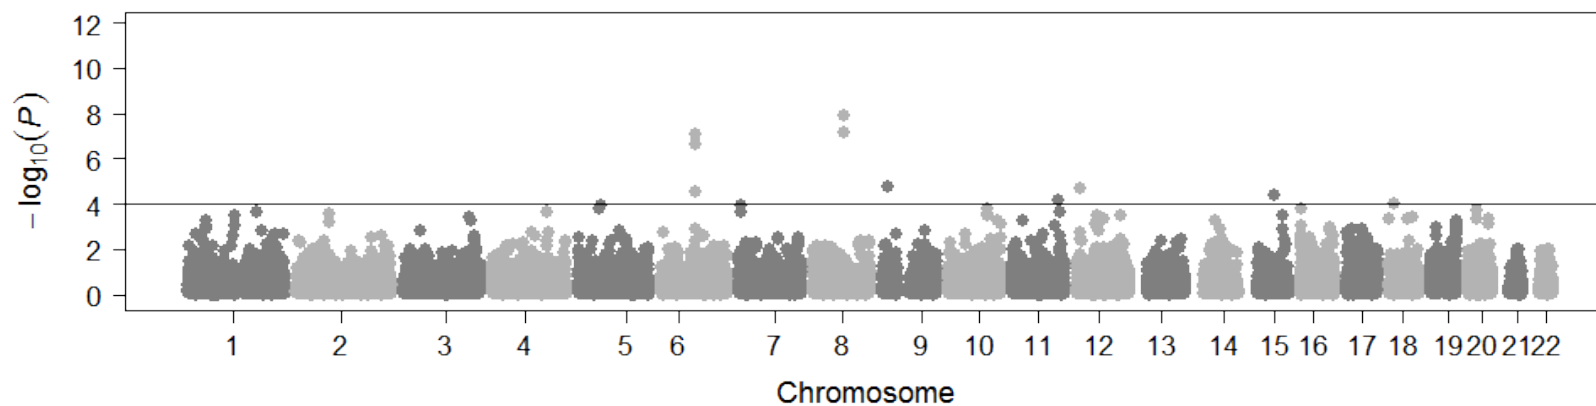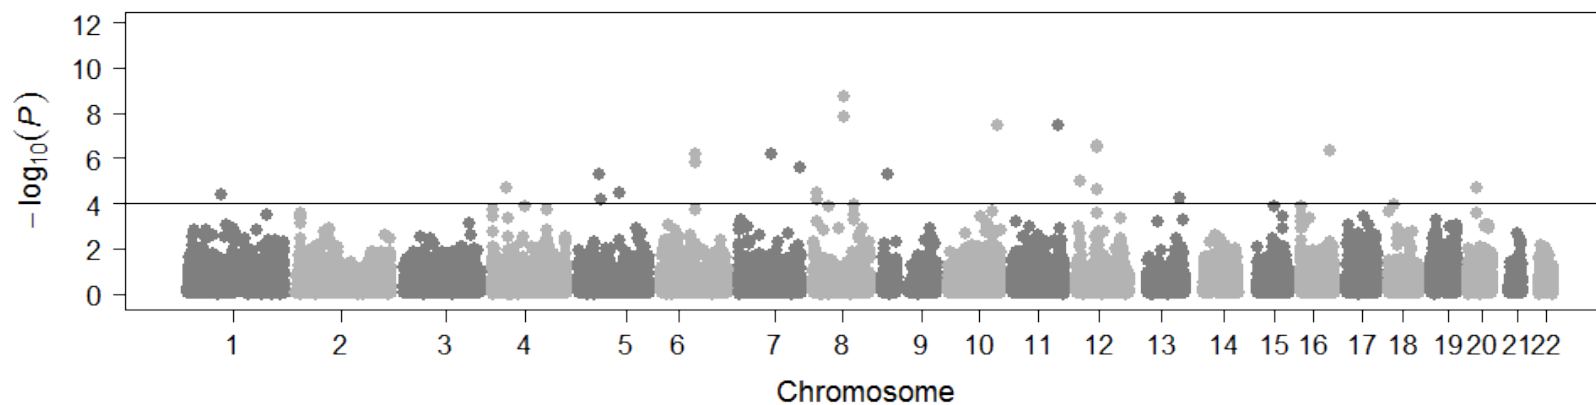



**Figure S16. Manhattan Plots of Gene-based Analysis Results from 1 degree of freedom test (above) and 2 degree of freedom joint test (below) for Pulse Pressure.**

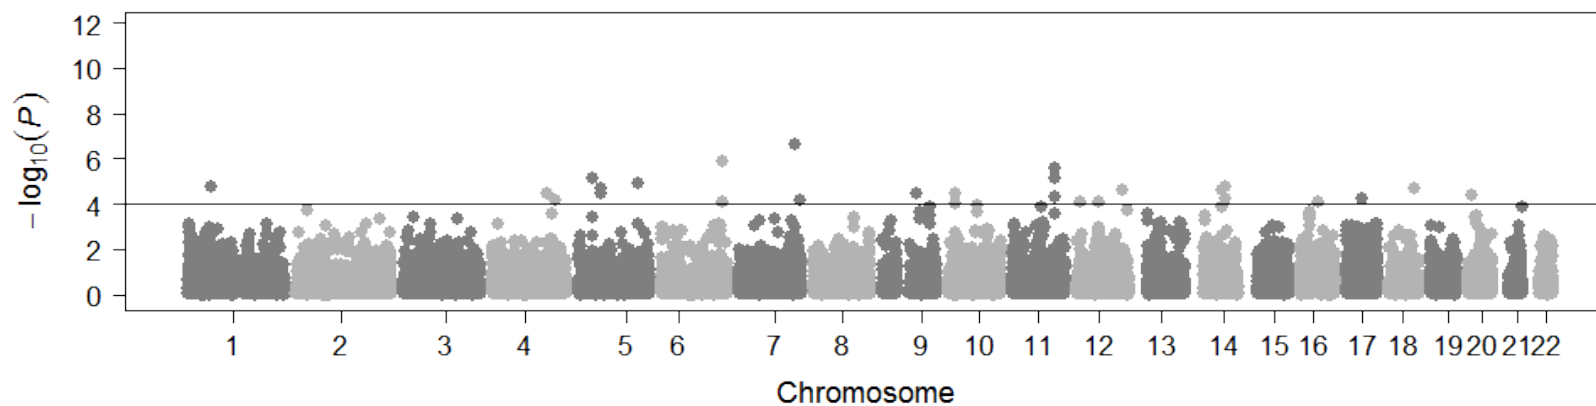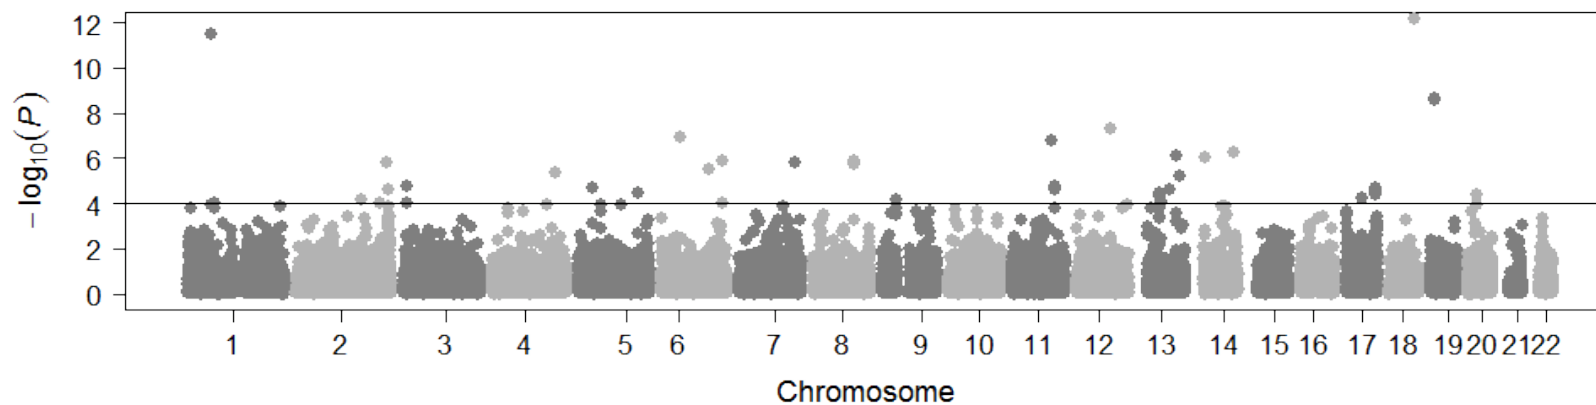

Supplement: NIHMS921927-supplement-001811_-_Supplemental_Material.pdf [file NIHMS921927-supplement-001811_-_Supplemental_Material.pdf]
